# Supplementary material
Source: PubMed Central journal article supplement (PMC9271325)
Supplement: NIHMS1818435-supplement-Supplemental_Table_1.pdf [file NIHMS1818435-supplement-Supplemental_Table_1.pdf]

**Supplemental Table I: Extended view of the Tiers for the reporting of Light Microscopy Metadata as proposed by the Imaging Standards Working Group of the 4D Nucleome initiative and by the Quality Control and Data Management Working Group of Bioimaging North America.**

| Category    | Tier Nr. | Name                                                                       | Description                                                                                                                                                                                               | Example Experiment Type                                                                                                                                                                                                                                                            | Example Labelling                                                                                                                            | Experimental/Sample                                                                                                      | Microscope hardware specifications                                                                                                                                                                                                                                                                                                                                                          | Image acquisition settings                                                                                                                                                                                                                                                | Optical calibration                 | Intensity calibration                   | Mechanical calibration |
|-------------|----------|----------------------------------------------------------------------------|-----------------------------------------------------------------------------------------------------------------------------------------------------------------------------------------------------------|------------------------------------------------------------------------------------------------------------------------------------------------------------------------------------------------------------------------------------------------------------------------------------|----------------------------------------------------------------------------------------------------------------------------------------------|--------------------------------------------------------------------------------------------------------------------------|---------------------------------------------------------------------------------------------------------------------------------------------------------------------------------------------------------------------------------------------------------------------------------------------------------------------------------------------------------------------------------------------|---------------------------------------------------------------------------------------------------------------------------------------------------------------------------------------------------------------------------------------------------------------------------|-------------------------------------|-----------------------------------------|------------------------|
| Descriptive | 1        | Minimum Information/Qualitative or Basic Quantification/Material & Methods | Reporting qualitative effects, or effects that require simple quantification including the identification of non-refractive limited objects followed by basic feature extraction and statistical analysis | Developmental and stem-biology experiments in which qualitative analysis of image data is used to support major findings, transfection control, viability assay, counting of cells and nuclei, expression level measurements, localization of markers in cellular sub-compartments | Histochemistry, Immunohistochemistry, Fluorescent In Situ Hybridization (FISH), Immuno Fluorescence (IF), Fluorescent Protein (FP) labelling | experimenter name; experiment description and date; sample description; mounting medium; temperature and CO2 conditions; | microscope manufacturer, model and type; light source manufacturer, wavelength and type; objective manufacturer, magnification, NA and correction; filter/dichroic transmittance range; detector manufacturer and type                                                                                                                                                                      | acquisition date; immersion liquid name and refractive index; illumination type and intensity; fluorophore; exposure time; pixel dwell time; channel name, color, contrast method and acquisition mode; image dimension order and number; physical pixel size x, y, and z | not required; recommended quarterly | not required; recommended annually      |                        |
|             | 2        | Advanced Quantification                                                    | Reporting quantitative effects that require advanced quantification including the localization of single molecules and tracking of intracellular dynamics                                                 | Diffraction-limited spot localization, measurement of distances, co-localization studies, detection of low-signal features, advanced processing, cell tracking and single-particle tracking, dynamic expression level quantification                                               | All of the above + Single Molecule (SM) FISH, CasFISH, SM Proximity Ligation Assay (PLA), dCas9-based labelling, OligoPaint                  | O2 pressure, and humidity conditions; refractive index of the mounting medium; thickness of the coverglass               | detailed environmental control device, microscope table, light source, light source coupling, transmittance light path, magnification, sample positioning, focusing, autofocus, filter, dichroic, additional optics and detector specification (e.g., lightsource spectral properties; objective correction properties; focusing device ZReproducibility, ZSettlingTime, ZResolution, etc.) | illumination attenuation; objective temperature and iris aperture; immersion liquid measured refractive index; sample positioning settings; detector integration; lighthpath configuration                                                                                | required monthly                    | highly-recommended monthly to quarterly |                        |
| Analytical  | 3        | Manufacturing/Technical Development/Full Documentation                     | Full documentation of microscopic setup, image acquisition and quality control                                                                                                                            | Microscopy hardware manufacturing; development of novel and yet to be validated technology in both commercial and academic settings; full reproducibility of microscopy setup and image acquisition settings                                                                       | All of the above                                                                                                                             | all the metadata specified by the data model - including any novel technology-specific metrics                           |                                                                                                                                                                                                                                                                                                                                                                                             |                                                                                                                                                                                                                                                                           | required for every acquisition      | required monthly to quarterly           |                        |

**Legend:** Each tier accommodates increasingly complex images, experiments, instrumentation, and analytical needs and therefore requires progressively more metadata. This tiered system is not intended to meet the needs of all imaging communities. Rather it is proposed as a framework that might need to be adapted and modified depending on the needs of individual data collection consortia, disciplines, or institutions.
